# Supplementary material for: An additive Gaussian process regression model for interpretable non-parametric analysis of longitudinal data
Source: PubMed Central journal article supplement (PMC6470127; doi:10.1038/s41467-019-09785-8), 2019-04-17
Supplement: 41467_2019_9785_MOESM1_ESM.pdf [file 41467_2019_9785_MOESM1_ESM.pdf]

Supplementary Information  
An additive Gaussian process regression model for interpretable  
non-parametric analysis of longitudinal data

Lu Cheng et al.

March 19, 2019

**Contents**

|                                                                                           |           |
|-------------------------------------------------------------------------------------------|-----------|
| <b>Supplementary Figures</b>                                                              | <b>2</b>  |
| <b>Supplementary Tables</b>                                                               | <b>8</b>  |
| <b>Supplementary Methods</b>                                                              | <b>10</b> |
| Supplementary Method 1: Methods for comparison in the simulation<br>experiments . . . . . | 10        |
| Linear mixed-effects model (LME) . . . . .                                                | 10        |
| Linear mixed-effects model (LME) with polynomial terms . . . . .                          | 12        |
| Gaussian process with automatic relevance determination (ARD)<br>kernel . . . . .         | 14        |
| Supplementary Method 2: LonGP algorithm . . . . .                                         | 15        |
| Supplementary Method 3: MCMC details . . . . .                                            | 17        |
| Supplementary Method 4: Software architecture . . . . .                                   | 17        |
| <b>Supplementary Notes</b>                                                                | <b>18</b> |
| Supplementary Note 1: Full comparison results on simulated datasets                       | 18        |
| Linear mixed-effects (LME) model . . . . .                                                | 18        |
| Linear mixed-effects model (LME) with polynomial terms . . . . .                          | 21        |
| Gaussian process with automatic relevance determination (ARD)<br>kernel . . . . .         | 23        |

## Supplementary Figures

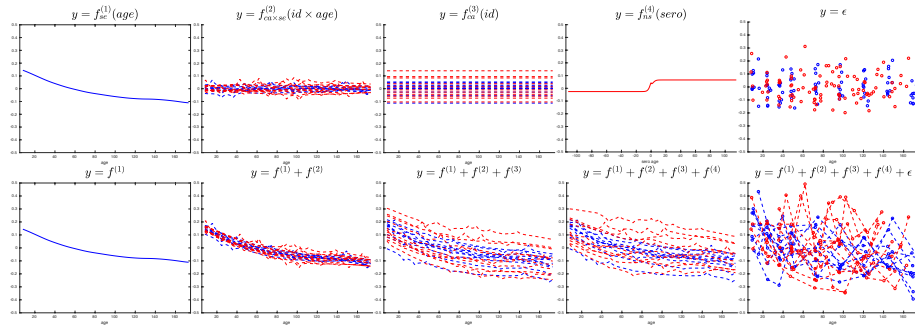

Supplementary Figure 1: Predicted components and cumulative effects for protein P07602 (Proteomics dataset). Top panel shows contributions of individual components and lower panel shows cumulative effects. Red lines correspond to cases and blue lines correspond to controls. Bottom right panel shows the (centred) data. Note, the  $x$ -axis of  $f^{(4)}$  is time relative to seroconversion age.

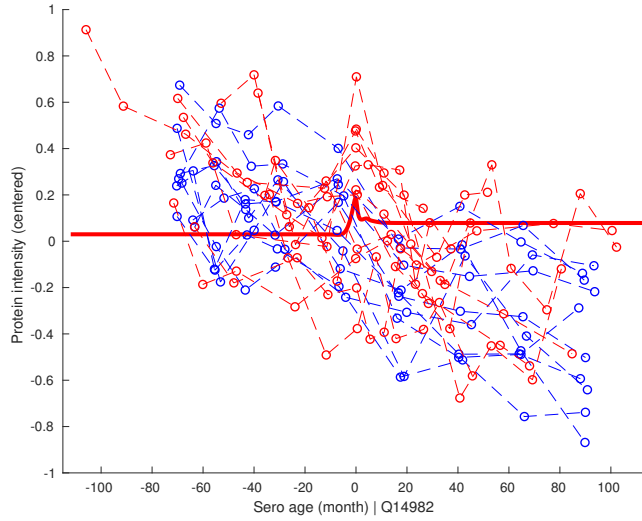

Supplementary Figure 2: Predicted mean of the *sero* component for protein Q14982 (Proteomics dataset). The dashed red lines show the measurements of cases and the dashed blue lines are measurements of controls.  $x$ -axis is time relative to seroconversion age and  $y$ -axis is centred protein intensity. Mean seroconversion age of all cases (79.42 month) is used as the seroconversion age for controls. The solid red line corresponds to the mean of the seroconversion component  $y = f_{n.s}^{(4)}(\textit{sero})$ .

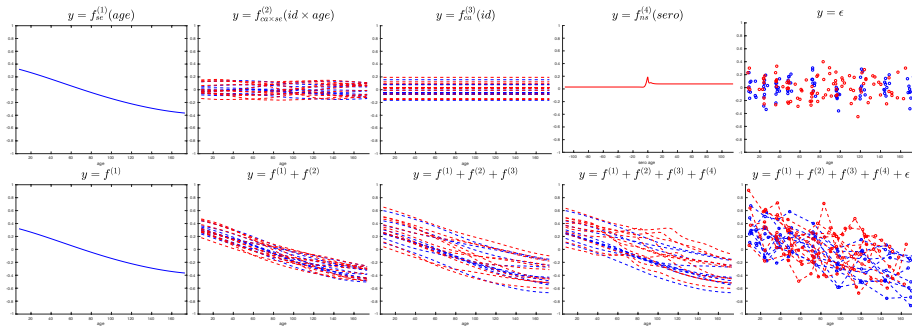

Supplementary Figure 3: Predicted components and cumulative effects for protein Q14982 (Proteomics dataset). Top panel shows contributions of individual components and lower panel shows cumulative effects. Red lines correspond to cases and blue lines correspond to controls. Bottom right panel shows the (centred) data. Note the  $x$ -axis of  $f^{(4)}$  is time relative to seroconversion age.

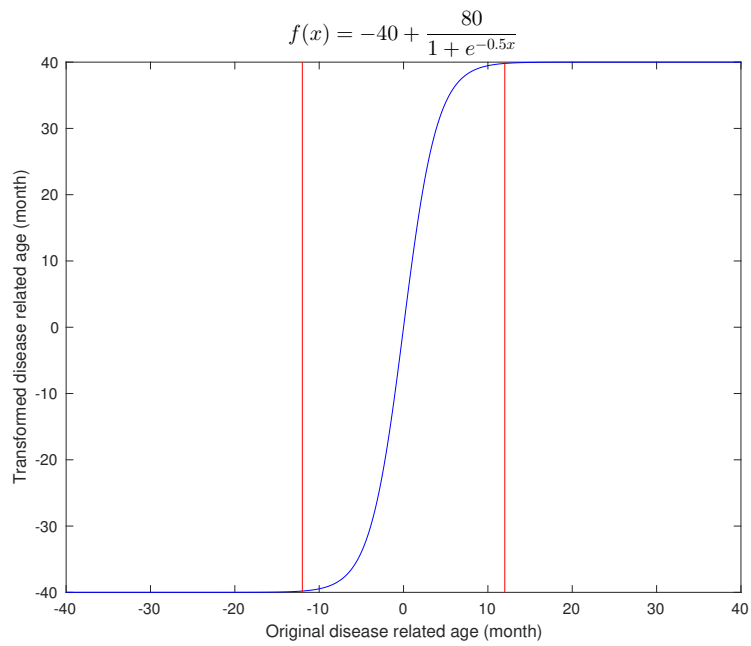

Supplementary Figure 4: Non-stationary transformation. The x-axis is the original disease related age and the y-axis is the transformed disease related age. Sigmoid function  $f(x) = -40 + \frac{80}{1 + e^{-0.5x}}$  is used for the transformation. The red bars indicate the positions of  $\pm 12$  month.

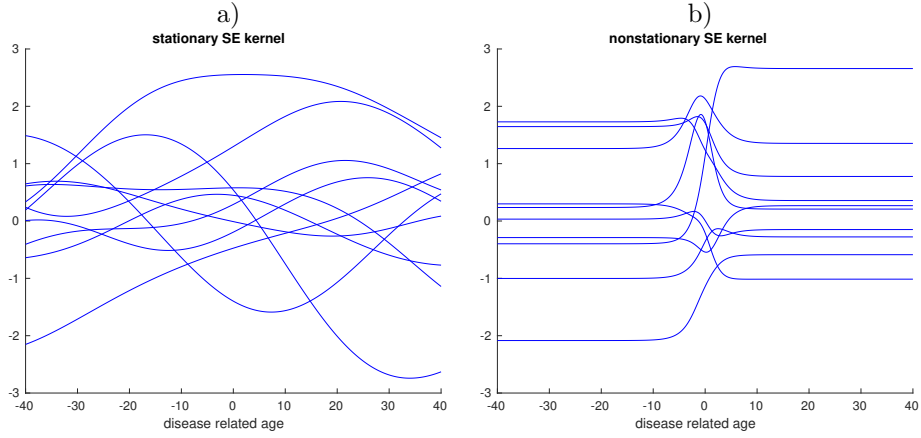

Supplementary Figure 5: Functions drawn from stationary and non-stationary SE (square exponential) kernel. a) Functions drawn from a stationary SE kernel with length-scale  $l_{se} = 1$  and magnitude  $\sigma_{se}^2 = 1$ . b) Functions drawn from a non-stationary SE kernel by first applying the transformation shown in Supplementary Figure 4 and then generated using the same SE kernel with scale  $l_{se} = 1$  and magnitude  $\sigma_{se}^2 = 1$ . Random functions are drawn using the standardised inputs and then transformed back to original range.

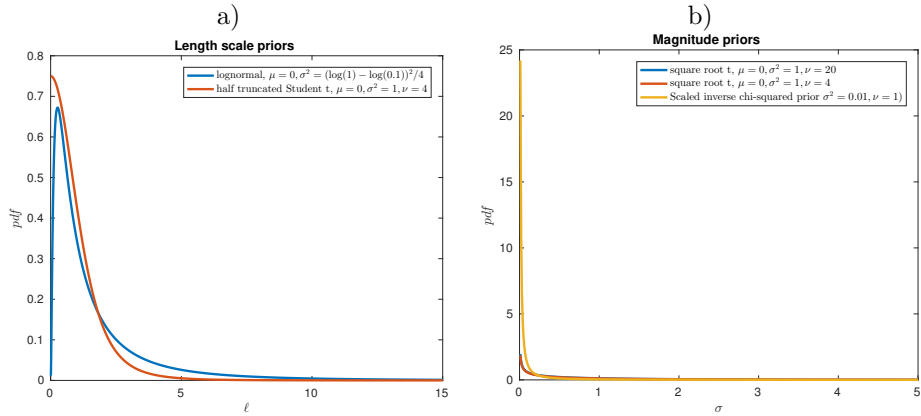

Supplementary Figure 6: Priors for kernel parameters. a) Priors for length-scales and b) priors for magnitude and noise variance. Note, that the target variable and continuous covariates are all standardised to mean 0 and standard deviation 1.

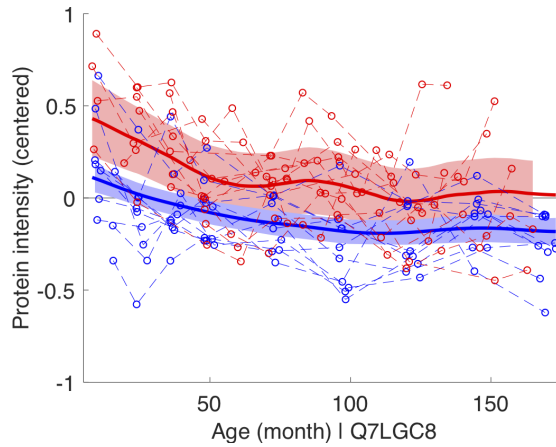

Supplementary Figure 7: Cumulative effect  $y = f_{se}^{(1)}(age) + f_{bi}^{(2)}(group) + f_{bi \times se}^{(3)}(group \times age)$  against real (centred) intensity of protein Q7LGC8 (Proteomics dataset). Red lines are cases and blue lines are controls. The red and blue shaded areas are the  $\pm\sigma$  of the predictive distribution on the original training data for the cases and controls, where  $\sigma$  refers to the pointwise standard deviation of the predictive distribution.

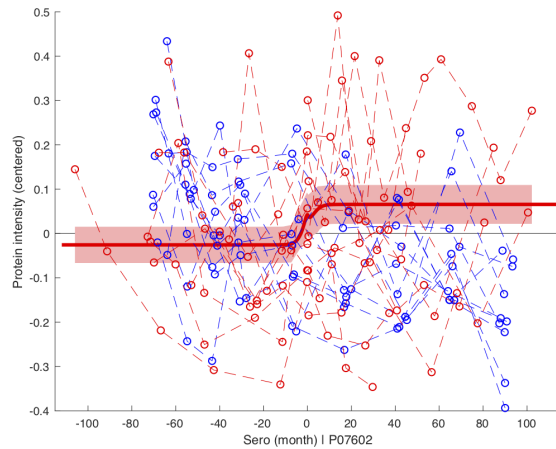

Supplementary Figure 8: Predicted mean of the *sero* component for protein P07602 (Proteomics dataset). The dashed red lines show the measurements of cases and the dashed blue lines are controls.  $x$ -axis indicates time from seroconversion and  $y$ -axis is the centred protein intensity. Mean seroconversion age of all cases (79.42 month) is used as the seroconversion age for controls. The solid red line corresponds to the mean of the seroconversion component  $y = f_{ns}^{(4)}(sero)$ . The red and blue shadow areas are the  $\pm\sigma$  of the predictive distribution on the original training data for the cases and controls, where  $\sigma$  refers to the pointwise standard deviation of the predictive distribution.

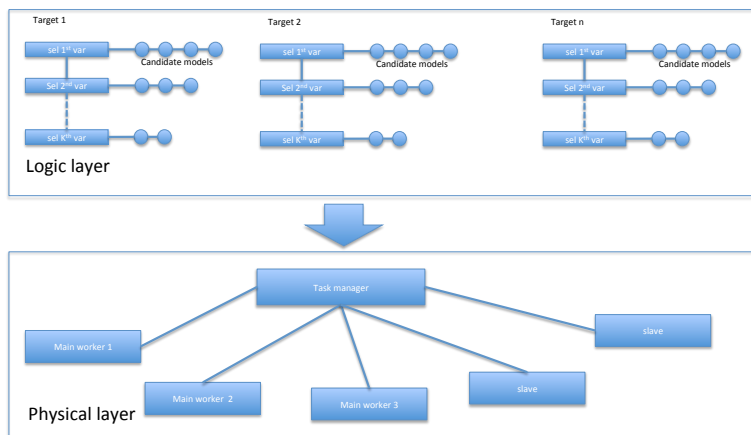

Supplementary Figure 9: Software architecture. The task manager monitors the whole process and schedules the tasks. The main worker ensures the tasks for a given target is executed in the right order. The slaves run parallel jobs assigned by the task managers.

## Supplementary Tables

Supplementary Table 1. Inclusion of *diseaseAge* in the final model as a function of noise variance. Table shows the number of times the *diseaseAge* covariate is included in the inferred model among 100 Monte Carlo simulations (Simulated dataset).

| Generated Datasets | noise = 1 | noise = 3 | noise = 5 | noise = 8 |
|--------------------|-----------|-----------|-----------|-----------|
| AGPM1              | 0         | 0         | 5         | 0         |
| AGPM2              | 0         | 1         | 0         | 2         |
| AGPM3              | 0         | 0         | 1         | 2         |
| AGPM4              | 98        | 97        | 98        | 97        |
| AGPM5              | 99        | 97        | 94        | 92        |

Supplementary Table 2. Inclusion of *diseaseAge* in the final model as a function of sample size. Table shows the number of times the *diseaseAge* covariate is included in the inferred model among 100 Monte Carlo simulations (Simulated dataset).

| Generated Datasets | 10 cases and 10 controls | 20 cases and 20 controls | 30 cases and 30 controls | 40 cases and 40 controls |
|--------------------|--------------------------|--------------------------|--------------------------|--------------------------|
| AGPM1              | 4                        | 0                        | 0                        | 0                        |
| AGPM2              | 0                        | 1                        | 0                        | 5                        |
| AGPM3              | 0                        | 0                        | 0                        | 0                        |
| AGPM4              | 94                       | 97                       | 99                       | 96                       |
| AGPM5              | 93                       | 97                       | 100                      | 100                      |

Supplementary Table 3. Model selection accuracy as a function of sampling time points. Table shows the number of times the correct model is identified among 100 Monte Carlo simulations. (Simulated dataset)

| Generated Datasets | 2 months | 3 months | 4 months | 6 months |
|--------------------|----------|----------|----------|----------|
| AGPM1              | 97       | 98       | 94       | 96       |
| AGPM2              | 95       | 95       | 88       | 85       |
| AGPM3              | 97       | 95       | 91       | 93       |
| AGPM4              | 96       | 92       | 86       | 86       |
| AGPM5              | 94       | 88       | 87       | 86       |



Supplementary Table 4. Inclusion of *diseaseAge* in the final model as a function of sampling time points. Table shows the number of times the *diseaseAge* covariate is included in the inferred model among 100 Monte Carlo simulations (Simulated dataset).

| Generated Datasets | 2 months | 3 months | 4 months | 6 months |
|--------------------|----------|----------|----------|----------|
| AGPM1              | 0        | 0        | 0        | 0        |
| AGPM2              | 0        | 1        | 3        | 4        |
| AGPM3              | 0        | 0        | 1        | 1        |
| AGPM4              | 100      | 97       | 94       | 92       |
| AGPM5              | 98       | 97       | 94       | 92       |

## Supplementary Methods

### Supplementary Method 1: Methods for comparison in the simulation experiments

This section provides a description of the implementation of the comparison methods in the simulation experiments. The input covariates are *age*, *diseaseAge*, *group*, *loc*, *gen*, and *id*, where *age* and *diseaseAge* are continuous and the rest are either binary or categorical. The output/target variable is denoted by *y* here.

#### Linear mixed-effects model (LME)

We first used the following linear mixed-effect model [1]:

$$y = \beta_0 + \sum_{i=1}^{n_f} \beta_i x_i + \sum_{i=1}^{n_r} b_i z_i + \epsilon, \quad (1)$$

where  $x_i$  is one of the  $n_f$  covariates with fixed effects,  $z_i$  is one of the  $n_r$  covariates with random effects,  $\beta_i$  and  $b_i$  are the corresponding linear coefficients and  $\epsilon$  is the *i.i.d* Gaussian noise. The key idea of LME is that  $\beta_i$  are independent of each other and is shared by all individuals, while  $b_i$  can be correlated with each other and assumed to be drawn from a multivariate Gaussian.

$$\mathbf{b} = (b_1, b_2, \dots, b_{n_r})^T \sim N(\mathbf{0}, \sigma^2 D(\theta)), \quad (2)$$

where  $\sigma^2$  controls the variance and  $D(\theta)$  parameterises the full  $n_r$ -by- $n_r$  correlation matrix. Maximum likelihood estimates are then obtained for all parameters in Eq. (1).

Here we use the LME model to incorporate the same covariates and their interactions as in `longP`. We model shared age and disease age effects, location, gender, and disease group effects as fixed effects. These are shown as single linear terms such as *age*, *dise*, *group*, *loc*, and *gen*. Note, that we have used *dise* to replace *diseaseAge* for brevity. The age effects specific to location, gender and disease group are also modelled as fixed effects which are shown as interaction terms, such as *loc*  $\times$  *age*, *gender*  $\times$  *age*, *group*  $\times$  *age*. The individual differences are modelled as random effects, shown as *id*  $\times$  *age* and *id*. Since there are 5 free

covariates, there are  $2^5 = 32$  models in total. We list all the models as follows:

$$\begin{aligned}
&y \sim 1 + [id] \\
&y \sim 1 + age + [age \times id + id] \\
&y \sim 1 + dise + [id] \\
&y \sim 1 + age + dise + [age \times id + id] \\
&y \sim 1 + loc + [id] \\
&y \sim 1 + age + loc + loc \times age + [age \times id + id] \\
&y \sim 1 + dise + loc + [id] \\
&y \sim 1 + age + dise + loc + loc \times age + [age \times id + id] \\
&y \sim 1 + gen + [id] \\
&y \sim 1 + age + gen + gen \times age + [age \times id + id] \\
&y \sim 1 + dise + gen + [id] \\
&y \sim 1 + age + dise + gen + gen \times age + [age \times id + id] \\
&y \sim 1 + loc + gen + [id] \\
&y \sim 1 + age + loc + gen + gen \times age + loc \times age + [age \times id + id] \\
&y \sim 1 + dise + loc + gen + [id] \\
&y \sim 1 + age + dise + loc + gen + gen \times age + loc \times age + [age \times id + id] \\
&y \sim 1 + group + [id] \\
&y \sim 1 + age + group + group \times age + [age \times id + id] \\
&y \sim 1 + dise + group + [id] \\
&y \sim 1 + age + dise + group + group \times age + [age \times id + id] \\
&y \sim 1 + loc + group + [id] \\
&y \sim 1 + age + loc + group + group \times age + loc \times age + [age \times id + id] \\
&y \sim 1 + dise + loc + group + [id] \\
&y \sim 1 + age + dise + loc + group + group \times age + loc \times age + [age \times id + id] \\
&y \sim 1 + gen + group + [id] \\
&y \sim 1 + age + gen + group + group \times age + gen \times age + [age \times id + id] \\
&y \sim 1 + dise + gen + group + [id] \\
&y \sim 1 + age + dise + gen + group + group \times age + gen \times age + [age \times id + id] \\
&y \sim 1 + loc + gen + group + [id] \\
&y \sim 1 + age + loc + gen + group + group \times age + gen \times age + loc \times age + [age \times id + id] \\
&y \sim 1 + dise + loc + gen + group + [id] \\
&y \sim 1 + age + dise + loc + gen + group + group \times age + gen \times age + loc \times age + [age \times id + id],
\end{aligned}$$

where the terms in the brackets are random effects and other terms are fixed effects. Linear coefficients are omitted for clarity.

For model selection, we use 10-fold cross validation to fit each model and make predictions, then calculate the root-mean-square error (RMSE) for each

model. After that, we compare the RMSE of each model and choose the one with the lowest RMSE.

We use the MATLAB (version 2017b) function `fitlme` for the implementation. The code is available at [https://github.com/chengl7/LonGP/blob/master/comparison/lmm/lmm\\_main.m](https://github.com/chengl7/LonGP/blob/master/comparison/lmm/lmm_main.m).

### **Linear mixed-effects model (LME) with polynomial terms**

In order to bring non-linearity into the modelling, we try to include a second order term for the continuous covariates in our models, i.e.,  $age^2$  and  $dise^2$ . The 32 models used are given as follows:

$$\begin{aligned}
y &\sim 1 + [id] \\
y &\sim 1 + age^2 + age + [age \times id + id] \\
y &\sim 1 + dise^2 + dise + [id] \\
y &\sim 1 + age^2 + age + dise^2 + dise + [age \times id + id] \\
y &\sim 1 + loc + [id] \\
y &\sim 1 + age^2 + age + loc + loc \times age + [age \times id + id] \\
y &\sim 1 + dise^2 + dise + loc + [id] \\
y &\sim 1 + age^2 + age + dise^2 + dise + loc + loc \times age + [age \times id + id] \\
y &\sim 1 + gen + [id] \\
y &\sim 1 + age^2 + age + gen + gen \times age + [age \times id + id] \\
y &\sim 1 + dise^2 + dise + gen + [id] \\
y &\sim 1 + age^2 + age + dise^2 + dise + gen + gen \times age + [age \times id + id] \\
y &\sim 1 + loc + gen + [id] \\
y &\sim 1 + age^2 + age + loc + gen + gen \times age + loc \times age + [age \times id + id] \\
y &\sim 1 + dise^2 + dise + loc + gen + [id] \\
y &\sim 1 + age^2 + age + dise^2 + dise + loc + gen + gen \times age + loc \times age + [age \times id + id] \\
y &\sim 1 + group + [id] \\
y &\sim 1 + age^2 + age + group + group \times age + [age \times id + id] \\
y &\sim 1 + dise^2 + dise + group + [id] \\
y &\sim 1 + age^2 + age + dise^2 + dise + group + group \times age + [age \times id + id] \\
y &\sim 1 + loc + group + [id] \\
y &\sim 1 + age^2 + age + loc + group + group \times age + loc \times age + [age \times id + id] \\
y &\sim 1 + dise^2 + dise + loc + group + [id] \\
y &\sim 1 + age^2 + age + dise^2 + dise + loc + group + group \times age + loc \times age + [age \times id + id] \\
y &\sim 1 + gen + group + [id] \\
y &\sim 1 + age^2 + age + gen + group + group \times age + gen \times age + [age \times id + id] \\
y &\sim 1 + dise^2 + dise + gen + group + [id] \\
y &\sim 1 + age^2 + age + dise^2 + dise + gen + group + group \times age + gen \times age + [age \times id + id] \\
y &\sim 1 + loc + gen + group + [id] \\
y &\sim 1 + age^2 + age + loc + gen + group + group \times age + gen \times age + loc \times age \\
&\quad + [age \times id + id] \\
y &\sim 1 + dise^2 + dise + loc + gen + group + [id] \\
y &\sim 1 + age^2 + age + dise^2 + dise + loc + gen + group + group \times age \\
&\quad + gen \times age + loc \times age + [age \times id + id],
\end{aligned}$$

where the terms in the brackets are random effects and other terms are fixed effects. Linear coefficients are omitted for clarity. The same procedures as described in the previous section are applied for selecting the best model. The implementation can be found at [https://github.com/chengl7/LonGP/blob/master/comparison/lmm/lmm\\_main1.m](https://github.com/chengl7/LonGP/blob/master/comparison/lmm/lmm_main1.m).

### Gaussian process with automatic relevance determination (ARD) kernel

Gaussian process with automatic relevance determination (ARD) kernel [2] is a standard method for feature selection with GPs. The ARD kernel for two inputs  $\mathbf{x} = (x_1, x_2, \dots, x_D)$  and  $\mathbf{x}' = (x'_1, x'_2, \dots, x'_D)$  is given as follows:

$$k(\mathbf{x}, \mathbf{x}') = \exp \left( -\frac{1}{2} \sum_{j=1}^D \frac{(x_j - x'_j)^2}{l_j^2} \right), \quad (3)$$

where  $l_j$  is the length scale for the  $j$ th covariate and  $D$  is the total number of covariates. ARD was originally proposed for continuous covariates but since longitudinal biomedical studies often involve discrete covariates as well, we modify and apply ARD here for a combination of continuous and discrete covariates as follows. We first normalise the continuous covariates, *age* and *diseaseAge* to mean  $\mu = 0$  and standard deviation  $\sigma = 1$ . For discrete covariates, we define the squared Euclidean distance as follows: if  $x_j = x'_j$ , then we use  $(x_j - x'_j)^2 = 0$ , and if  $x_j \neq x'_j$  then we define  $(x_j - x'_j)^2 = d$ . We empirically set  $d$  to a value of 4. The idea is to assign maximal correlation to discrete data items with the same value and an appropriate smaller correlation to data items with different values, such that all covariates have similar variances and length scales become comparable for feature selection.

The importance of a covariate lies on its linear coefficient  $\lambda_j = \frac{1}{l_j^2}$  in the ARD kernel. The larger the length scale the smaller the linear coefficient, and thus is an indication of a less important covariate. We normalise the linear coefficients by

$$\tilde{\lambda}_k = \frac{\lambda_k}{\sum_{j=1}^D \lambda_j}, \quad (4)$$

then select the covariate if  $\tilde{\lambda}_k$  is greater than 0.05. The covariate *id* is always included for ease of comparison with other methods.

We use MATLAB (version 2017b) function `fitrgp` for the implementation, where we have implemented a customised kernel function for the ARD kernel as described above. The type-II maximum likelihood estimates are then obtained by numerical optimisation using the `quasinewton` optimiser. The code is available at [https://github.com/chengl7/LonGP/blob/master/comparison/ard/ard\\_main.m](https://github.com/chengl7/LonGP/blob/master/comparison/ard/ard_main.m).

## Supplementary Method 2: LonGP algorithm

This section describes in detail how the covariate selection process works. Let us denote a given set of continuous covariates by  $\mathbf{C} = (V_1, V_2, \dots, V_c)$  and the discrete covariates by  $\mathbf{B} = (V_{c+1}, V_{c+2}, \dots, V_{c+b})$ , where  $c$  and  $b$  are the number of continuous and binary/categorical variables. The categorical covariate  $id$  must be included in set  $\mathbf{B}$ . In LonGP, the user needs to provide the kernel types (Sec. 2.4) for all the given covariates, as well as indicate whether interactions for each covariate are allowed. The data is automatically standardised and the parameter priors for kernels are predefined (see Sec. 2.5). For any given subset of covariates (must include  $id$ ), the additive GP model is constructed by the following rules:

1. Construct a kernel for each covariate according to the given kernel type and add it to the model.
2. For each continuous covariate that allows interaction, construct product kernels with all categorical/binary covariates that also allow interactions (and that are also covariates of a given model) and add them to the model.
3. For each pair of categorical/binary covariates (excluding  $id$ ) that allows interactions, construct a product kernel and add it to the model.
4. Add the noise to finalise the model.

For any covariate subset  $\mathbf{V}$ , we can construct a GP model  $\text{GPM}(\mathbf{V})$  according

to these four steps. The covariates are then selected by the following algorithm:

---

**Algorithm 1:** Stepwise GP regression algorithm

---

**Result:** A GP model

Set the current selected covariate set to  $\mathbf{V}_{\text{curr}} = \{id\}$  and the current model to  $\text{GPM}(\mathbf{V}_{\text{curr}})$ , infer the parameters using MCMC and perform LOOCV ;

**for**  $i \leftarrow 1$  **to**  $c$  **do**

- foreach**  $V_j \in \mathbf{C} \setminus \mathbf{V}_{\text{curr}}$  **do**
  - Add  $V_j$  and build a candidate model  $\text{GPM}(\mathbf{V}_{\text{curr}} \cup V_j)$ , run MCMC and perform LOOCV ;
- end**
- Compare all the generated candidate models (Section 2.7.3) and choose the best model  $\text{GPM}(\mathbf{V}_{\text{curr}} \cup V_{\text{best}})$  ;
- Calculate LOOCVF of  $\text{GPM}(\mathbf{V}_{\text{curr}} \cup V_{\text{best}})$  versus  $\text{GPM}(\mathbf{V}_{\text{curr}})$  ;
- if**  $\text{LOOCVF} \geq 0.8$  **then**
  - Set  $\mathbf{V}_{\text{curr}} = \mathbf{V}_{\text{curr}} \cup V_{\text{best}}$ , update the current model accordingly ;
- else**
  - break** ;
- end**

**end**

Perform SCV on the current model ;

**for**  $i \leftarrow 1$  **to**  $b$  **do**

- foreach**  $V_j \in \mathbf{B} \setminus \mathbf{V}_{\text{curr}}$  **do**
  - Add  $V_j$  and build a candidate model  $\text{GPM}(\mathbf{V}_{\text{curr}} \cup V_j)$ , use numerical integration with CCD and perform SCV ;
- end**
- Compare all the generated candidate models (Section 2.7.3) and choose the best model  $\text{GPM}(\mathbf{V}_{\text{curr}} \cup V_{\text{best}})$  ;
- Calculate SCVF of  $\text{GPM}(\mathbf{V}_{\text{curr}} \cup V_{\text{best}})$  versus  $\text{GPM}(\mathbf{V}_{\text{curr}})$  ;
- if**  $\text{SCVF} \geq 0.95$  **then**
  - Set  $\mathbf{V}_{\text{curr}} = \mathbf{V}_{\text{curr}} \cup V_{\text{best}}$ , update the current model accordingly ;
- else**
  - break** ;
- end**

**end**

Make the current model the final model and run MCMC inference. ;

Make predictions using each component (kernel) on the training data, calculate the variances. ;

Calculate the explained variance (variances divided by the sum) of each component, delete components that have lower variances than a user defined threshold ;

---

The algorithm tries to select covariates with reasonably large effects and the thresholds of the LOOCVF and SCVF are determined by the user (defaults are 0.8 and 0.95).



### Supplementary Method 3: MCMC details

We start 4 independent Markov chains from different, randomly initialised initial parameter values. Then, we combine the 4 chains and check the convergence by throwing away 500 burn-in samples and thinning the remaining 2000 samples by 5. If converged, then quit; otherwise we thin the combined chain further by 2. If not converged, we repeat the process and check the convergence from the resulting combined markov chains, for at most 4 times. The potential reduction scaling factor (PRSF) [3]  $R$  is used to check the convergence by the following rules: if  $R \leq 1.1$ , converged; if  $1.1 < R \leq 1.2$ , does not converge well; if  $R > 1.2$ , does not converge.

### Supplementary Method 4: Software architecture

In many occasions more than one target variable is measured, such as in transcriptome studies using microarrays or RNA-sequencing, which means that we need to run LongGP for many target variables at the same time. Fortunately, several parts of our method can be efficiently parallelised. We designed the LongGP software package so that it can be easily deployed and parallelised in a modern computing cluster with shared storage, as shown in Supplementary Fig. 9. Briefly, there are three types of nodes in the physical layer. The task manager monitors the whole process and assigns different tasks to the main workers and slaves. The main workers focus on one target variable and ensure that the tasks are executed in the right order. It also informs the task manager about the parallel tasks that are available. The slaves run parallel tasks assigned by the task manager. When a main worker finishes its job, it will turn into a slave node.

## Supplementary Notes

### Supplementary Note 1: Full comparison results on simulated datasets

#### Linear mixed-effects (LME) model

Supplementary Table 5. Model inference results for simulated data with 20 cases and 20 controls, noise variance  $\sigma_\epsilon^2 = 3$  and samples taken every 3 months. Rows show the number of times each model is inferred as the best model using LME. ‘Others’ corresponds to all the other 27 possible AGPM models. The last two columns show the number of times the *diseaseAge* covariate has or has not been included in the final model

| Generated \ Predicted | Predicted |           |           |           |           |        | <i>diseaseAge</i> included | <i>diseaseAge</i> not included |
|-----------------------|-----------|-----------|-----------|-----------|-----------|--------|----------------------------|--------------------------------|
|                       | AGPM1     | AGPM2     | AGPM3     | AGPM4     | AGPM5     | Others |                            |                                |
| AGPM1                 | <b>6</b>  | 42        | 8         | 2         | 4         | 38     | 17                         | 83                             |
| AGPM2                 | 1         | <b>57</b> | 8         | 7         | 3         | 24     | 16                         | 84                             |
| AGPM3                 | 0         | 12        | <b>51</b> | 1         | 5         | 31     | 13                         | 87                             |
| AGPM4                 | 0         | 2         | 3         | <b>19</b> | 3         | 73     | 63                         | 37                             |
| AGPM5                 | 0         | 0         | 4         | 6         | <b>18</b> | 72     | 56                         | 44                             |

Supplementary Table 6. Model selection accuracy as a function of noise variance. Table shows the number of times the correct model is identified using LME.

| Generated Datasets | noise = 1 | noise = 3 | noise = 5 | noise = 8 |
|--------------------|-----------|-----------|-----------|-----------|
| AGPM1              | 10        | 6         | 16        | 13        |
| AGPM2              | 64        | 57        | 57        | 54        |
| AGPM3              | 62        | 51        | 48        | 52        |
| AGPM4              | 16        | 19        | 19        | 20        |
| AGPM5              | 15        | 18        | 21        | 11        |

Supplementary Table 7. Model selection accuracy as a function of sample size. Table shows the number of times the correct model is identified using LME.

| Generated Datasets | 10 cases and 10 controls | 20 cases and 20 controls | 30 cases and 30 controls | 40 cases and 40 controls |
|--------------------|--------------------------|--------------------------|--------------------------|--------------------------|
| AGPM1              | 30                       | 6                        | 7                        | 1                        |
| AGPM2              | 53                       | 57                       | 56                       | 55                       |
| AGPM3              | 38                       | 51                       | 63                       | 64                       |
| AGPM4              | 14                       | 19                       | 12                       | 9                        |
| AGPM5              | 15                       | 18                       | 15                       | 12                       |

Supplementary Table 8. Model selection accuracy as a function of sampling time points. Table shows the number of times the correct model is identified using LME.

| Generated Datasets | 2 months | 3 months | 4 months | 6 months |
|--------------------|----------|----------|----------|----------|
| AGPM1              | 8        | 6        | 10       | 0        |
| AGPM2              | 50       | 57       | 57       | 60       |
| AGPM3              | 42       | 51       | 62       | 53       |
| AGPM4              | 16       | 19       | 16       | 26       |
| AGPM5              | 17       | 18       | 13       | 16       |

Supplementary Table 9. Inclusion of *diseaseAge* in the final model for simulated data with 20 cases and 20 controls, noise variance  $\sigma_\epsilon^2 = 3$  and samples taken every 3 months. Table shows the number of times the *diseaseAge* covariate is included in the inferred model using LME.

| Generated Datasets | <i>diseaseAge</i> detected | <i>diseaseAge</i> not detected |
|--------------------|----------------------------|--------------------------------|
| AGPM1              | 17                         | 83                             |
| AGPM2              | 16                         | 84                             |
| AGPM3              | 13                         | 87                             |
| AGPM4              | 63                         | 37                             |
| AGPM5              | 56                         | 44                             |

Supplementary Table 10. Inclusion of *diseaseAge* in the final model as a function of noise variance. Table shows the number of times the *diseaseAge* covariate is included in the inferred model using LME.

| Generated Datasets | noise = 1 | noise = 3 | noise = 5 | noise = 8 |
|--------------------|-----------|-----------|-----------|-----------|
| AGPM1              | 11        | 17        | 18        | 13        |
| AGPM2              | 17        | 16        | 18        | 12        |
| AGPM3              | 8         | 13        | 19        | 12        |
| AGPM4              | 55        | 63        | 66        | 61        |
| AGPM5              | 62        | 56        | 60        | 63        |

Supplementary Table 11. Inclusion of *diseaseAge* in the final model as a function of sample size. Table shows the number of times the *diseaseAge* covariate is included in the inferred model using LME.

| Generated Datasets | 10 cases and 10 controls | 20 cases and 20 controls | 30 cases and 30 controls | 40 cases and 40 controls |
|--------------------|--------------------------|--------------------------|--------------------------|--------------------------|
| AGPM1              | 15                       | 17                       | 16                       | 15                       |
| AGPM2              | 21                       | 16                       | 15                       | 17                       |
| AGPM3              | 15                       | 13                       | 14                       | 13                       |
| AGPM4              | 52                       | 63                       | 65                       | 64                       |
| AGPM5              | 57                       | 56                       | 62                       | 66                       |

Supplementary Table 12. Inclusion of *diseaseAge* in the final model as a function of sampling time points. Table shows the number of times the *diseaseAge* covariate is included in the inferred model using LME.

| Generated Datasets | 2 months | 3 months | 4 months | 6 months |
|--------------------|----------|----------|----------|----------|
| AGPM1              | 19       | 17       | 12       | 19       |
| AGPM2              | 17       | 16       | 12       | 17       |
| AGPM3              | 22       | 13       | 10       | 14       |
| AGPM4              | 63       | 63       | 64       | 61       |
| AGPM5              | 59       | 56       | 52       | 46       |

### Linear mixed-effects model (LME) with polynomial terms

Supplementary Table 13. Model inference results for simulated data with 20 cases and 20 controls, noise variance  $\sigma_\epsilon^2 = 3$  and samples taken every 3 months. Rows show the number of times each model is inferred as the best model using LME with polynomial terms. ‘Others’ corresponds to all the other 27 possible AGPM models. The last two columns show the number of times the *diseaseAge* covariate has or has not been included in the final model

| Generated | Predicted | AGPM1     | AGPM2     | AGPM3     | AGPM4     | AGPM5 | Others | <i>diseaseAge</i><br>included | <i>diseaseAge</i><br>not included |
|-----------|-----------|-----------|-----------|-----------|-----------|-------|--------|-------------------------------|-----------------------------------|
|           | AGPM1     | <b>10</b> | 37        | 6         | 3         | 2     | 42     | 12                            | 88                                |
| AGPM2     | 0         | <b>50</b> | 9         | 2         | 1         | 38    | 10     | 90                            |                                   |
| AGPM3     | 0         | 14        | <b>41</b> | 1         | 4         | 40    | 12     | 88                            |                                   |
| AGPM4     | 0         | 0         | 0         | <b>25</b> | 5         | 70    | 72     | 28                            |                                   |
| AGPM5     | 0         | 1         | 2         | 6         | <b>19</b> | 72    | 64     | 36                            |                                   |

Supplementary Table 14. Model selection accuracy as a function of noise variance. Table shows the number of times the correct model is identified using LME with polynomial terms.

| Generated Datasets | noise = 1 | noise = 3 | noise = 5 | noise = 8 |
|--------------------|-----------|-----------|-----------|-----------|
| AGPM1              | 12        | 10        | 18        | 18        |
| AGPM2              | 51        | 50        | 51        | 52        |
| AGPM3              | 54        | 41        | 47        | 52        |
| AGPM4              | 25        | 25        | 22        | 19        |
| AGPM5              | 21        | 19        | 16        | 16        |

Supplementary Table 15. Model selection accuracy as a function of sample size. Table shows the number of times the correct model is identified using LME with polynomial terms.

| Generated Datasets | 10 cases and<br>10 controls | 20 cases and<br>20 controls | 30 cases and<br>30 controls | 40 cases and<br>40 controls |
|--------------------|-----------------------------|-----------------------------|-----------------------------|-----------------------------|
| AGPM1              | 35                          | 10                          | 6                           | 3                           |
| AGPM2              | 42                          | 50                          | 50                          | 46                          |
| AGPM3              | 34                          | 41                          | 51                          | 58                          |
| AGPM4              | 18                          | 25                          | 17                          | 15                          |
| AGPM5              | 17                          | 19                          | 14                          | 15                          |

Supplementary Table 16. Model selection accuracy as a function of sampling time points. Table shows the number of times the correct model is identified using LME with polynomial terms.

| Generated Datasets | 2 months | 3 months | 4 months | 6 months |
|--------------------|----------|----------|----------|----------|
| AGPM1              | 11       | 10       | 13       | 2        |
| AGPM2              | 44       | 50       | 58       | 51       |
| AGPM3              | 46       | 41       | 58       | 59       |
| AGPM4              | 17       | 25       | 20       | 21       |
| AGPM5              | 17       | 19       | 17       | 20       |

Supplementary Table 17. Inclusion of *diseaseAge* in the final model for simulated data with 20 cases and 20 controls, noise variance  $\sigma_\epsilon^2 = 3$  and samples taken every 3 months. Table shows the number of times the *diseaseAge* covariate is included in the inferred model using LME with polynomial terms.

| Generated Datasets | <i>diseaseAge</i> detected | <i>diseaseAge</i> not detected |
|--------------------|----------------------------|--------------------------------|
| AGPM1              | 12                         | 88                             |
| AGPM2              | 10                         | 90                             |
| AGPM3              | 12                         | 88                             |
| AGPM4              | 72                         | 28                             |
| AGPM5              | 64                         | 36                             |

Supplementary Table 18. Inclusion of *diseaseAge* in the final model as a function of noise variance. Table shows the number of times the *diseaseAge* covariate is included in the inferred model using LME with polynomial terms.

| Generated Datasets | noise = 1 | noise = 3 | noise = 5 | noise = 8 |
|--------------------|-----------|-----------|-----------|-----------|
| AGPM1              | 9         | 12        | 8         | 12        |
| AGPM2              | 10        | 10        | 12        | 15        |
| AGPM3              | 11        | 12        | 12        | 10        |
| AGPM4              | 66        | 72        | 69        | 62        |
| AGPM5              | 70        | 64        | 60        | 57        |

Supplementary Table 19. Inclusion of *diseaseAge* in the final model as a function of sample size. Table shows the number of times the *diseaseAge* covariate is included in the inferred model using LME with polynomial terms.

| Generated Datasets | 10 cases and 10 controls | 20 cases and 20 controls | 30 cases and 30 controls | 40 cases and 40 controls |
|--------------------|--------------------------|--------------------------|--------------------------|--------------------------|
| AGPM1              | 9                        | 12                       | 11                       | 12                       |
| AGPM2              | 19                       | 10                       | 11                       | 13                       |
| AGPM3              | 17                       | 12                       | 10                       | 10                       |
| AGPM4              | 58                       | 72                       | 72                       | 77                       |
| AGPM5              | 62                       | 64                       | 67                       | 77                       |

Supplementary Table 20. Inclusion of *diseaseAge* in the final model as a function of sampling time points. Table shows the number of times the *diseaseAge* covariate is included in the inferred model using LME with polynomial terms.

| Generated Datasets | 2 months | 3 months | 4 months | 6 months |
|--------------------|----------|----------|----------|----------|
| AGPM1              | 9        | 12       | 9        | 9        |
| AGPM2              | 20       | 10       | 7        | 12       |
| AGPM3              | 10       | 12       | 8        | 8        |
| AGPM4              | 70       | 72       | 68       | 58       |
| AGPM5              | 62       | 64       | 65       | 55       |

### Gaussian process with automatic relevance determination (ARD) kernel

Supplementary Table 21. Model inference results for simulated data with 20 cases and 20 controls, noise variance  $\sigma_\epsilon^2 = 3$  and samples taken every 3 months. Rows show the number of times each model is inferred as the best model using GP with ARD kernel. ‘Others’ corresponds to all the other 27 possible AGPM models. The last two columns show the number of times the *diseaseAge* covariate has or has not been included in the final model

| Generated \ Predicted | Predicted |           |           |           |           |        | <i>diseaseAge</i> included | <i>diseaseAge</i> not included |
|-----------------------|-----------|-----------|-----------|-----------|-----------|--------|----------------------------|--------------------------------|
|                       | AGPM1     | AGPM2     | AGPM3     | AGPM4     | AGPM5     | Others |                            |                                |
| AGPM1                 | <b>92</b> | 0         | 0         | 0         | 0         | 8      | 0                          | 100                            |
| AGPM2                 | 0         | <b>88</b> | 2         | 0         | 0         | 10     | 2                          | 98                             |
| AGPM3                 | 0         | 60        | <b>31</b> | 1         | 1         | 7      | 9                          | 91                             |
| AGPM4                 | 0         | 18        | 0         | <b>47</b> | 4         | 31     | 71                         | 29                             |
| AGPM5                 | 0         | 19        | 11        | 15        | <b>21</b> | 34     | 54                         | 46                             |

Supplementary Table 22. Model selection accuracy as a function of noise variance. Table shows the number of times the correct model is identified using GP with ARD kernel.

| Generated Datasets | noise = 1 | noise = 3 | noise = 5 | noise = 8 |
|--------------------|-----------|-----------|-----------|-----------|
| AGPM1              | 93        | 92        | 90        | 91        |
| AGPM2              | 90        | 88        | 81        | 72        |
| AGPM3              | 30        | 31        | 35        | 47        |
| AGPM4              | 62        | 47        | 47        | 30        |
| AGPM5              | 16        | 21        | 18        | 20        |

Supplementary Table 23. Model selection accuracy as a function of sample size. Table shows the number of times the correct model is identified using GP with ARD kernel.

| Generated Datasets | 10 cases and 10 controls | 20 cases and 20 controls | 30 cases and 30 controls | 40 cases and 40 controls |
|--------------------|--------------------------|--------------------------|--------------------------|--------------------------|
| AGPM1              | 86                       | 92                       | 98                       | 99                       |
| AGPM2              | 71                       | 88                       | 88                       | 96                       |
| AGPM3              | 38                       | 31                       | 27                       | 25                       |
| AGPM4              | 24                       | 47                       | 49                       | 44                       |
| AGPM5              | 40                       | 21                       | 11                       | 6                        |

Supplementary Table 24. Model selection accuracy as a function of sampling time points. Table shows the number of times the correct model is identified using GP with ARD kernel.

| Generated Datasets | 2 months | 3 months | 4 months | 6 months |
|--------------------|----------|----------|----------|----------|
| AGPM1              | 94       | 92       | 86       | 88       |
| AGPM2              | 91       | 88       | 75       | 75       |
| AGPM3              | 29       | 31       | 35       | 41       |
| AGPM4              | 53       | 47       | 42       | 28       |
| AGPM5              | 12       | 21       | 25       | 21       |



Supplementary Table 25. Inclusion of *diseaseAge* in the final model for simulated data with 20 cases and 20 controls, noise variance  $\sigma_\epsilon^2 = 3$  and samples taken every 3 months. Table shows the number of times the *diseaseAge* covariate is included in the inferred model using GP with ARD kernel.

| Generated Datasets | <i>diseaseAge</i> detected | <i>diseaseAge</i> not detected |
|--------------------|----------------------------|--------------------------------|
| AGPM1              | 0                          | 100                            |
| AGPM2              | 2                          | 98                             |
| AGPM3              | 9                          | 91                             |
| AGPM4              | 71                         | 29                             |
| AGPM5              | 54                         | 46                             |

Supplementary Table 26. Inclusion of *diseaseAge* in the final model as a function of noise variance. Table shows the number of times the *diseaseAge* covariate is included in the inferred model using GP with ARD kernel.

| Generated Datasets | noise = 1 | noise = 3 | noise = 5 | noise = 8 |
|--------------------|-----------|-----------|-----------|-----------|
| AGPM1              | 0         | 0         | 0         | 0         |
| AGPM2              | 3         | 2         | 8         | 12        |
| AGPM3              | 1         | 9         | 5         | 5         |
| AGPM4              | 70        | 71        | 73        | 63        |
| AGPM5              | 71        | 54        | 64        | 55        |

Supplementary Table 27. Inclusion of *diseaseAge* in the final model as a function of sample size. Table shows the number of times the *diseaseAge* covariate is included in the inferred model using GP with ARD kernel.

| Generated Datasets | 10 cases and 10 controls | 20 cases and 20 controls | 30 cases and 30 controls | 40 cases and 40 controls |
|--------------------|--------------------------|--------------------------|--------------------------|--------------------------|
| AGPM1              | 1                        | 0                        | 0                        | 0                        |
| AGPM2              | 12                       | 2                        | 7                        | 1                        |
| AGPM3              | 5                        | 9                        | 3                        | 6                        |
| AGPM4              | 71                       | 71                       | 81                       | 78                       |
| AGPM5              | 75                       | 54                       | 67                       | 75                       |

Supplementary Table 28. Inclusion of *diseaseAge* in the final model as a function of sampling time points. Table shows the number of times the *diseaseAge* covariate is included in the inferred model using GP with ARD kernel.

| Generated Datasets | 2 months | 3 months | 4 months | 6 months |
|--------------------|----------|----------|----------|----------|
| AGPM1              | 0        | 0        | 2        | 3        |
| AGPM2              | 0        | 2        | 11       | 13       |
| AGPM3              | 1        | 9        | 8        | 10       |
| AGPM4              | 73       | 71       | 67       | 66       |
| AGPM5              | 50       | 54       | 58       | 53       |

## Supplementary References

- [1] Andrzej Galecki. *Linear Mixed-Effects Models Using R*. Springer Publishing Company, Incorporated, 2015.
- [2] Radford M. Neal. *Bayesian Learning for Neural Networks*. Springer-Verlag, Berlin, Heidelberg, 1996.
- [3] A. Gelman, J.B. Carlin, H.S. Stern, D.B. Dunson, A. Vehtari, and D.B. Rubin. *Bayesian Data Analysis, Third Edition*. Chapman & Hall/CRC Texts in Statistical Science. Taylor & Francis, 2013.
