# Supplementary material for: An additive Gaussian process regression model for interpretable non-parametric analysis of longitudinal data
Source: PubMed Central journal article supplement (PMC6470127; doi:10.1038/s41467-019-09785-8), 2019-04-17
Supplement: 41467_2019_9785_MOESM3_ESM.pdf [file 41467_2019_9785_MOESM3_ESM.pdf]

## **Description of Additional Supplementary Files**

File Name: Supplementary Data 1

Description: Model selection results of LME, LME-P, and GP-ARD over all simulated datasets.

File Name: Supplementary Data 2

Description: Full metagenomics dataset results including the selected models and explained variances of the components for all 394 pathways.

File Name: Supplementary Data 3

Description: Full proteomics dataset results including the selected models and explained variances of each component for all 1538 proteins.
